# Supplementary material for: Longitudinal shape irregularity of airway lumen assessed by CT in patients with bronchial asthma and COPD
Source: HighWire-hosted journal article supplement (doi:10.1136/thoraxjnl-2014-206651), 2015-05-29
Supplement: thoraxjnl-2014-206651supp.pdf [file thoraxjnl-2014-206651supp.pdf]

## **ONLINE APPENDIX**

### **Validation of airway analysis using a phantom**

The validity of our method for measurement of longitudinal structure of the airway lumen was examined using an airway phantom (Kyoto Kagaku Co., Ltd., Kyoto, Japan) (Fig. S2). The phantom consisted of eight acryl tubes with varying diameters (Fig. S2A). This phantom was scanned with the same conditions as those for the subjects (Fig. S2B). The measurements using our software were compared with theoretical values. Figure S3 shows the correlation between measured values and theoretical values from the phantoms. The correlation coefficient was high ( $r = 0.995$ ) and the slope of regression line was close to 1.0 (Fig. S3).
